# Supplementary material
Source: PubMed Central journal article supplement (PMC5837534)
Supplement: jew304_supp.pdf [file jew304_supp.pdf]

1 **Novel application of 3D contrast-enhanced CMR to define fibrotic structure of the human**  
2 **sinoatrial node *in vivo***

3 **Author names:** Thomas A. Csepe<sup>1</sup>, Jichao Zhao<sup>2</sup>, Lidiya V. Sul<sup>1</sup>, Yufeng Wang<sup>2</sup>, Brian J.  
4 Hansen<sup>1</sup>, Ning Li<sup>1</sup>, Anthony J. Ignozzi<sup>1</sup>, Anna Bratasz<sup>1,3</sup>, Kimerly A. Powell<sup>1,3</sup>, Ahmet Kilic<sup>3,4</sup>,  
5 Peter J. Mohler<sup>1,3,5</sup>, Paul M.L. Janssen<sup>1,3,5</sup>, John Hummel<sup>3,5</sup>, Orlando P. Simonetti<sup>3,6</sup>, Vadim V.  
6 Fedorov<sup>1,3</sup>

7

8 **Affiliations:** 1- Department of Physiology & Cell Biology, The Ohio State University Wexner  
9 Medical Center, 304 Hamilton Hall, 1645 Neil Avenue, Columbus, OH 43210, USA; 2- Auckland  
10 Bioengineering Institute, The University of Auckland, 70 Symonds Street, Auckland 1142, New  
11 Zealand; 3- Davis Heart & Lung Research Institute, The Ohio State University Wexner Medical  
12 Center, 473 W 12th Avenue, Columbus, OH 43210, USA; 4- Department of Surgery, The Ohio  
13 State University Wexner Medical Center, 410 W. 10th Avenue, Columbus, OH 43210, USA; 5-  
14 Department of Internal Medicine, The Ohio State University Wexner Medical Center, 395 W  
15 12th avenue, Columbus, OH 43210, USA; 6- Department of Biomedical Informatics, The Ohio  
16 State University Wexner Medical Center, 250 Lincoln Tower, 1800 Cannon Drive, Columbus,  
17 OH 43210, USA.

18

19 **Address for correspondence:** Vadim V. Fedorov, PhD  
20 300 Hamilton Hall, 1645 Neil Avenue, Columbus OH 43210-1218  
21 tel: 1-614-292-9892 fax: 1-614-292-4888 e-mails: [vadim.fedorov@osumc.edu](mailto:vadim.fedorov@osumc.edu)

22

23

24

25

26

27

## 28 SUPPLEMENTAL METHODS

### 29 *In vivo* LGE-CMR and fibrosis estimation

30 Volunteers underwent LGE-CMR scans using a 3T MAGNETOM Tim Trio (Siemens  
31 HealthCare) with a spatial resolution of 1.0mm<sup>3</sup> (Volunteers #1,3,4 and #5) or  
32 0.625x0.625x1.25mm<sup>3</sup> (Volunteer #2). LGE-CMR scans were acquired 18-25min following 0.2  
33 mmol/kg gadolinium agent injection. An ECG-gated, fat-suppressed 3D inversion recovery  
34 gradient recalled echo sequence with respiratory navigator gating was used. Typical scan  
35 parameters were as follows: echo time- 2ms, flip angle- 20<sup>0</sup>, inversion time- 300ms, repetition  
36 time- 4.4ms, and receiver bandwidth- 355Hz/pixel, 8-10min scan time. 3D image data covering  
37 the entire heart including both atria and both ventricles were acquired and reformatted into 2D  
38 cross sections (1mm or 1.25mm thick, **Table S1**). Volunteer #1 was scanned a second time one  
39 year later to show the results from a scan with a different contrast agent and is referred to as  
40 Volunteer #1B (**Table 1** and **Figure 3**).

41

42 From *in vivo* LGE-CMR images, the atrial chamber walls were identified, segmented, smoothed  
43 to an isotropic resolution, and volume rendered as a 3D reconstruction using a custom-written  
44 Matlab (MathWorks Inc.) program and visualized in 3D using both Matlab and Amira programs  
45 (FEI Company) (**Figure 1**). Atrial wall thickness consisted of 2-5mm except interatrial septum  
46 (IAS), and crista terminalis (CT) region. Due to in-flow artifact in the pulmonary veins caused by  
47 navigator pulses for respiration gating, the left atrium (LA) was hyper-enhanced in some views,  
48 limiting analysis to only the RA (**Figure 1A**).

49

50 A patient-specific fibrotic mask was applied to the 3D LGE-CMR atrial structure (**Figure S1**).  
51 Signal intensity thresholds at standard deviations (SD) above the average RA free wall (RAFW)  
52 signal intensity, a low-intensity area that served as the signal intensity reference, were

53 considered areas of high intensity post contrast (**Figures 2-3**). These areas of high signal  
54 intensity were defined as fibrotic tissue in accordance with previously published atrial fibrosis  
55 quantification studies using a similar method(11;13). The heart-specific threshold for SAN LGE  
56 fibrosis was selected from within a range, as was done previously (14), to achieve a percent of  
57 fibrotic content within the SAN region consistent with reported values for healthy adult human  
58 hearts (35-55%)(6;9). **Table 1** shows fibrosis analysis for thresholds of 2, 2.5, 3, and 4 SD  
59 above the RAFW for each volunteer. Subsequently, fibrosis segments were used to distinguish  
60 the SAN from surrounding atrial regions by computing a finite difference grid mesh. Regional  
61 LGE percentage for the SAN, RAFW, and IAS was calculated by fractionating the area of LGE,  
62 based on the applied threshold, from total selected tissue area. 3D fibrosis density maps were  
63 constructed at each voxel by determining the percent of neighboring voxels above the threshold  
64 within a 5 pixel radius. The delineation of the medial SAN border was not always distinct due to  
65 the presence of fibrosis in SVC and IAS, which was consistent with *ex vivo* analysis. Thus,  
66 maximum SAN width was limited to 9 mm.

67

### 68 **Optical mapping of coronary-perfused human atrial preparations**

69 Patient-specific data can be found in **Table 2**. Explanted human hearts were cardioplegically-  
70 arrested and cooled to 4°C in the operating room following cross-clamping of the aorta. Hearts  
71 were stored in cold cardioplegic solution (4°C) during transport, dissection, and cannulation.  
72 Human atrial preparations were isolated as previously described (1;2), coronary-perfused and  
73 superfused with 36.5±0.5°C oxygenated Tyrode's solution under constantly maintained pH  
74 (7.35±0.05) and pressure (55±5mm Hg) (2;3). Thus, stable heart rhythm, atrial conduction, and  
75 repolarization were maintained in the entire preparation for 4-8 hours (1;2). The atrial  
76 preparations were immobilized with 10µM blebbistatin and stained with voltage sensitive, near-  
77 infrared dye di-4-ANBDQBS(2). All mapped atrial preparations excluded regions of poor  
78 coronary perfusion/ischemia.

79

80 In Heart #1, optical action potentials (OAPs) were recorded using a high-resolution (optical field-  
81 of-view  $3.3 \times 3.3 \text{ cm}^2$ ,  $330 \mu\text{m}$  resolution) CMOS camera (MiCAM Ultima-L, SciMedia Ltd, CA;  
82  $100 \times 100$  pixels), both of which were focused on the epicardium. In Heart #2, the high-resolution  
83 CMOS camera and three panoramic CMOS cameras simultaneously recorded atrial signals  
84 from the epicardium. In the three lateral right atria preparations, Hearts #3-5, a dual-sided  
85 optical mapping system (endocardial and epicardial,  $330 \mu\text{m}^2$  resolution, and panoramic,  $940 \mu\text{m}^2$   
86 resolution CMOS cameras ( $100 \times 100$  pixels), MiCAM Ultima-L, SciMedia Ltd, CA) developed by  
87 our laboratory was used to obtain simultaneous sub-endocardial and sub-epicardial intramural  
88 weighted OAPs. Excitation light simultaneously illuminated both surfaces to excite di-4-  
89 ANBDQBS such that each camera recorded intramural OAPs (1-4mm deep), specifically  
90 weighted from the sub-endocardial and sub-epicardial layers, to visualize intramural SAN  
91 signals (**Figure 4**). OAPs from the SAN and atria were analyzed using a custom Matlab  
92 computer program as previously described (4). Additionally, activation maps and movies were  
93 used to visualize SAN and atrial activation.

94

#### 95 ***Ex vivo* CE-CMR**

96 Following optical mapping, CE-CMR was performed on atrial preparations as previously  
97 described (5). CE-CMR and histology of *ex vivo* atria were used to define SAN within the lateral  
98 right atria (RA) structure as previously described (5). After the mapping experiments, RA were  
99 formalin fixed for 48-72 hours, then washed out with PBS and incubated at  $4^\circ\text{C}$  in 0.2% Gd-  
100 DTPA (dimeglumine gadopentetate Magnevist, Bayer Schering Pharma) for 3-6 days in order to  
101 perform a post-contrast CE-CMR. Right atria were imaged using a 9.4T Bruker BioSpin  
102 Spectrometer (Ettlingen, Germany) and a 72mm volume coil. FLASH\_3Dslab\_bas protocol was  
103 used to obtain high-resolution images with the following parameters: echo time 2.4ms, repetition  
104 time 12.7ms, flip angle  $45\text{-}55^\circ$ , and number of averages = 4. Volume images with up to  $90 \mu\text{m}^3$

105 resolution of regions  $2.5 \times 6 \times 6 \text{ cm}^3$  were obtained in 3-4 hours (**Figure 4D-E**). 2D CMR images of  
106 the SAN (**Figure 5**) were segmented and smoothed using a custom-written Matlab (MathWorks  
107 Inc.) program and visualized in 3D using both Matlab and Amira (FEI Company) (**Figure 4D-E**).

108

### 109 ***Ex vivo* tissue dissection and staining**

110 In the *ex vivo* heart preparations (n=5), immunostaining and histological staining (n=5) were  
111 used to delineate SAN structural location. SAN activation maps were projected to the epicardial  
112 surface of preparations to guide SAN histological dissection (**Figure 5A**). SAN pacemaker  
113 complex and surrounding atrial myocardium, including crista terminalis (CT), right atrial free wall  
114 (RAFW), superior vena cava (SVC) and interatrial septum (IAS), were formalin-fixed, paraffin-  
115 embedded and serial sectioned ( $5 \mu\text{m}$  thick sections) from the epicardium to the endocardium as  
116 previously described(6). Roughly fifteen sections from each heart were stained with Masson's  
117 trichrome (Sigma Aldrich) for all *ex vivo* hearts. In Heart #1, Heart #3, and Heart #5, an average  
118 of five sections across the SAN head, center, and tail of each heart were immuno-labeled with  
119 Connexin43 (Cx43, Sigma Aldrich) and Vimentin (Abcam) or Cx43 and alpha-actinin (Abcam).  
120 Histology sections were imaged with a 20x digital slide scanner ( $0.5 \times 0.5 \mu\text{m}^2$  resolution, Aperio  
121 ScanScope XT, Leica). High-resolution images of immuno-labeled slides were captured by an  
122 Olympus FV1000 Filter confocal (**Supplemental Figure S2A**), and whole slide images were  
123 imaged by a Typhoon 9410 imager (GE Healthcare) (**Supplemental Figure S2B**). Histology  
124 and immunostaining images were used to identify and delineate the SAN pacemaker tissue  
125 from the surrounding right atria based on positive (atrial myocardium) and negative (SAN) Cx43  
126 expression, distinct cell morphology, cell diameter and percent tissue fibrosis as previously  
127 described by our group and other human *ex vivo* SAN studies(7-10).

128

129

130 **Reference List**

131

132 (1) Fedorov VV, Glukhov AV, Ambrosi CM, KostECKI G, Chang R, Janks D, et al. Effects of  
133 KATP channel openers diazoxide and pinacidil in coronary-perfused atria and ventricles  
134 from failing and non-failing human hearts. *J Mol Cell Cardiol* 2011;51(2):215-25.

135 (2) Fedorov VV, Glukhov AV, Chang R, KostECKI G, Aferol H, Hucker WJ, et al. Optical  
136 mapping of the isolated coronary-perfused human sinus node. *J Am Coll Cardiol*  
137 2010;56(17):1386-94.

138 (3) Fedorov VV, Chang R, Glukhov AV, KostECKI G, Janks D, Schuessler RB, et al.  
139 Complex interactions between the sinoatrial node and atrium during reentrant  
140 arrhythmias in the canine heart. *Circulation* 2010;122(8):782-9.

141 (4) Fedorov VV, Schuessler RB, Hemphill M, Ambrosi CM, Chang R, Voloshina AS, et al.  
142 Structural and functional evidence for discrete exit pathways that connect the canine  
143 sinoatrial node and atria. *Circ Res* 2009;104(7):915-23.

144 (5) Hansen BJ, Zhao J, Csepe TA, Moore BT, Li N, Jayne LA, et al. Atrial fibrillation driven  
145 by micro-anatomic intramural re-entry revealed by simultaneous sub-epicardial and sub-  
146 endocardial optical mapping in explanted human hearts. *Eur Heart J* 2015;36(35):2390-  
147 401.

148 (6) Csepe TA, Zhao J, Hansen BJ, Li N, Sul LV, Lim P, et al. Human sinoatrial node  
149 structure: 3D microanatomy of sinoatrial conduction pathways. *Prog Biophys Mol Biol*  
150 2016;120(1-3):164-78.

151 (7) James TN. Anatomy of the human sinus node. *Anat Rec* 1961;141:109-39.

152 (8) Csepe TA, Kalyanasundaram A, Hansen BJ, Zhao J, Fedorov VV. Fibrosis: a structural  
153 modulator of sinoatrial node physiology and dysfunction. *Front Physiol* 2015;6:37.

154 (9) Chandler N, Aslanidi O, Buckley D, Inada S, Birchall S, Atkinson A, et al. Computer  
155 three-dimensional anatomical reconstruction of the human sinus node and a novel  
156 paranodal area. *Anat Rec (Hoboken)* 2011;294(6):970-9.

157 (10) Shiraishi I, Takamatsu T, Minamikawa T, Onouchi Z, Fujita S. Quantitative histological  
158 analysis of the human sinoatrial node during growth and aging. *Circulation*  
159 1992;85(6):2176-84.

160

161

162

163 **Table S1 – *In vivo* Patient Data**

| Volunteer # | Sex | Age | Heart Status | LGE-CMR Resolution (mm <sup>3</sup> ) | Contrast Agent |
|-------------|-----|-----|--------------|---------------------------------------|----------------|
| 1A          | M   | 41  | Healthy      | 1x1x1                                 | Magnevist      |
| 1B          | M   | 42  | Healthy      | 1x1x1                                 | Prohance       |
| 2           | M   | 23  | Healthy      | 0.625x0.625x1.25                      | Magnevist      |
| 3           | M   | 48  | Healthy      | 1x1x1                                 | Prohance       |
| 4           | M   | 52  | Healthy      | 1x1x1                                 | Prohance       |
| 5           | M   | 24  | Healthy      | 1x1x1                                 | Prohance       |

164

165 **Table S2 – *Ex vivo* Patient Data**

| Heart # | Heart ID | Sex | Age | Heart Weight (g) | Diagnosis (Cause of Death) | CE MRI Resolution (µm <sup>3</sup> ) |
|---------|----------|-----|-----|------------------|----------------------------|--------------------------------------|
| 1       | 749693   | F   | 63  | 608              | None (MVA)                 | 110x125x110                          |
| 2       | 402879   | M   | 65  | 643              | Hypertension (CVA/ICH)     | 100x100x100                          |
| 3       | 364587   | M   | 19  | 300              | None (MVA)                 | 90x90x90                             |
| 4       | 415217   | M   | 54  | 474              | Hypertension (ICB/ICH)     | 100x100x100                          |
| 5       | 947200   | M   | 42  | 508              | None (ICB/ICH)             | 178x184x359                          |

166 Abbreviations: CVA- cerebrovascular accident; DM- diabetes mellitus; HTN-hypertension; ICB-

167 intracerebral bleed; ICH-intracerebral hemorrhage; MVA- motor vehicle accident.



168 **Table S3- *In vivo* and *Ex vivo* SAN size**

| <b>SAN Size</b>       |               |              |              |                       |               |              |              |
|-----------------------|---------------|--------------|--------------|-----------------------|---------------|--------------|--------------|
| <b><i>In vivo</i></b> |               |              |              | <b><i>Ex vivo</i></b> |               |              |              |
| <b>Volunteer #</b>    | <b>Length</b> | <b>Width</b> | <b>Depth</b> | <b>Heart #</b>        | <b>Length</b> | <b>Width</b> | <b>Depth</b> |
| 1A                    | 23.3          | 8            | 3.3          | 1                     | 26.6          | 4.9          | 2.5          |
| 1B                    | 24.1          | 8.4          | 3            | 2                     | 19            | 4.7          | 1.7          |
| 2                     | 25.5          | 6.3          | 2.3          | 3                     | 25.8          | 3.4          | 2            |
| 3                     | 25            | 6.7          | 2.9          | 4                     | 21.5          | 5.3          | 2.1          |
| 4                     | 23.3          | 6.1          | 2.5          | 5                     | 16.5          | 3.5          | 2.5          |
| 5                     | 20.1          | 7.5          | 3.1          |                       |               |              |              |
|                       |               |              |              |                       |               |              |              |
| Average               | 23.6          | 7.2          | 2.9          |                       | 21.9          | 4.4          | 2.2          |
| SD                    | 1.9           | 0.9          | 0.4          |                       | 4.3           | 0.9          | 0.3          |

169

170 **Figure S1**

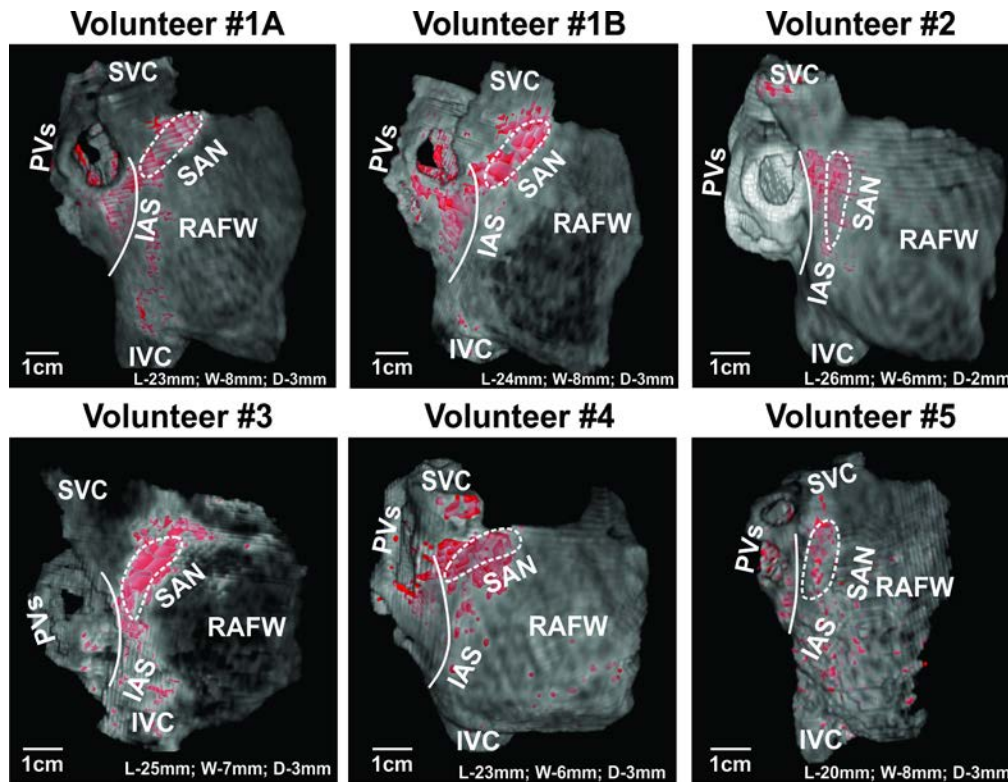

171

172 **Figure S1 *In vivo* SAN identification by LGE-CMR**

173 Lateral views of Volunteers #1-5 atrial reconstructions showing enhanced signal at the junction  
174 of the SVC and right atria corresponding to the anatomical location of the SAN. In Volunteer #1,  
175 enhanced regions are observed in similar locations in the first scan (#1A) and the second scan  
176 (#1B), which was performed over one year after the initial scan. Abbreviations; D- depth; IAS-  
177 interatrial septum; IVC- inferior vena cava; L- length; PVs- pulmonary veins; RAFW- right atrial  
178 free wall; SAN; sinoatrial node; SVC; superior vena cava; W-width.

179

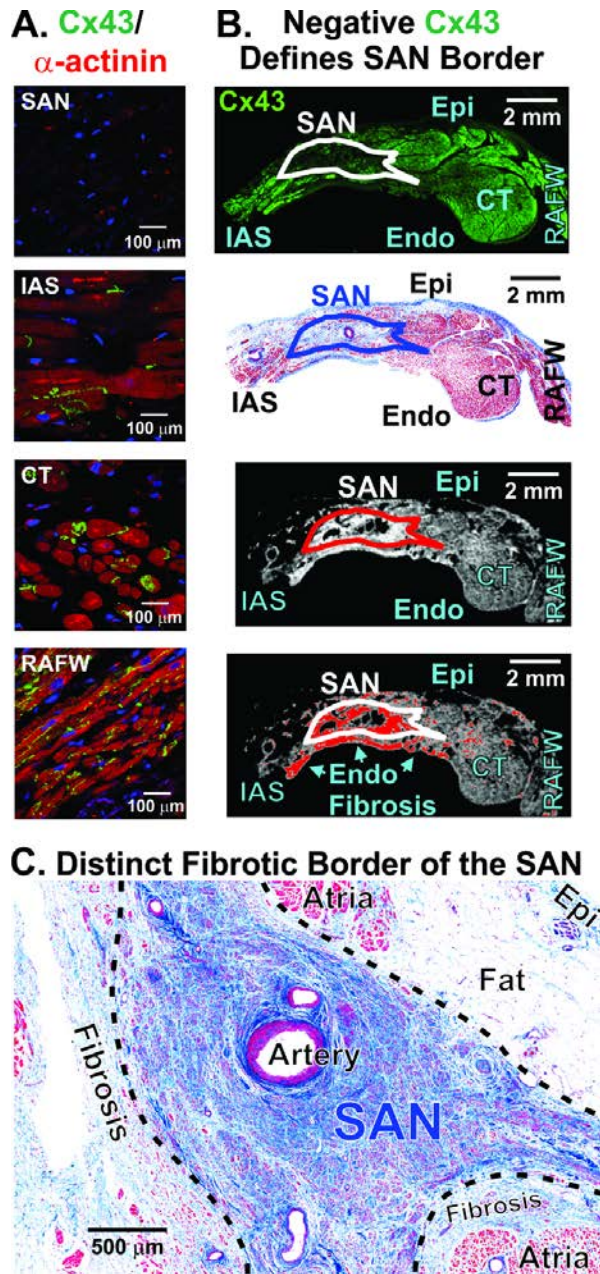

181

182 **Figure S2- Delineation of the Human SAN**

183 **A.** High resolution sections immunostained for connexin 43 (Cx43, green) and  $\alpha$ -actinin (red)  
 184 show Cx43 positivity in the interatrial septum (IAS), crista terminalis (CT), and right atrial free  
 185 wall (RAFW). **B.** From top to bottom: Cx43 immunostained section with SAN outlined as Cx43

186 negative region; Masson's Trichrome stained section with SAN outlined as compact fibrotic  
187 region; 2D contrast-enhanced CMR (CE-CMR) image of the same section as histology with the  
188 histologically validated SAN border overlaid; 2D CE-CMR cross section with fibrosis  
189 enhancement mask applied shows fibrotic content within the SAN as well as adjacent  
190 endocardial layer. **C.** Masson's trichrome staining showing distinct SAN location based on  
191 dense fibrosis (blue) in SAN compared to surrounding atria, which is composed mainly of  
192 cardiomyocyte (red) tissue. Abbreviations as in Supplementary **Figure S1**; Endo- endocardium;  
193 Epi- epicardium.
